# Supplementary material for: Prediction model of emergency mortality risk in patients with acute upper gastrointestinal bleeding: a retrospective study
Source: PeerJ journal article supplement (doi:10.7717/peerj.11656), 2021-06-24

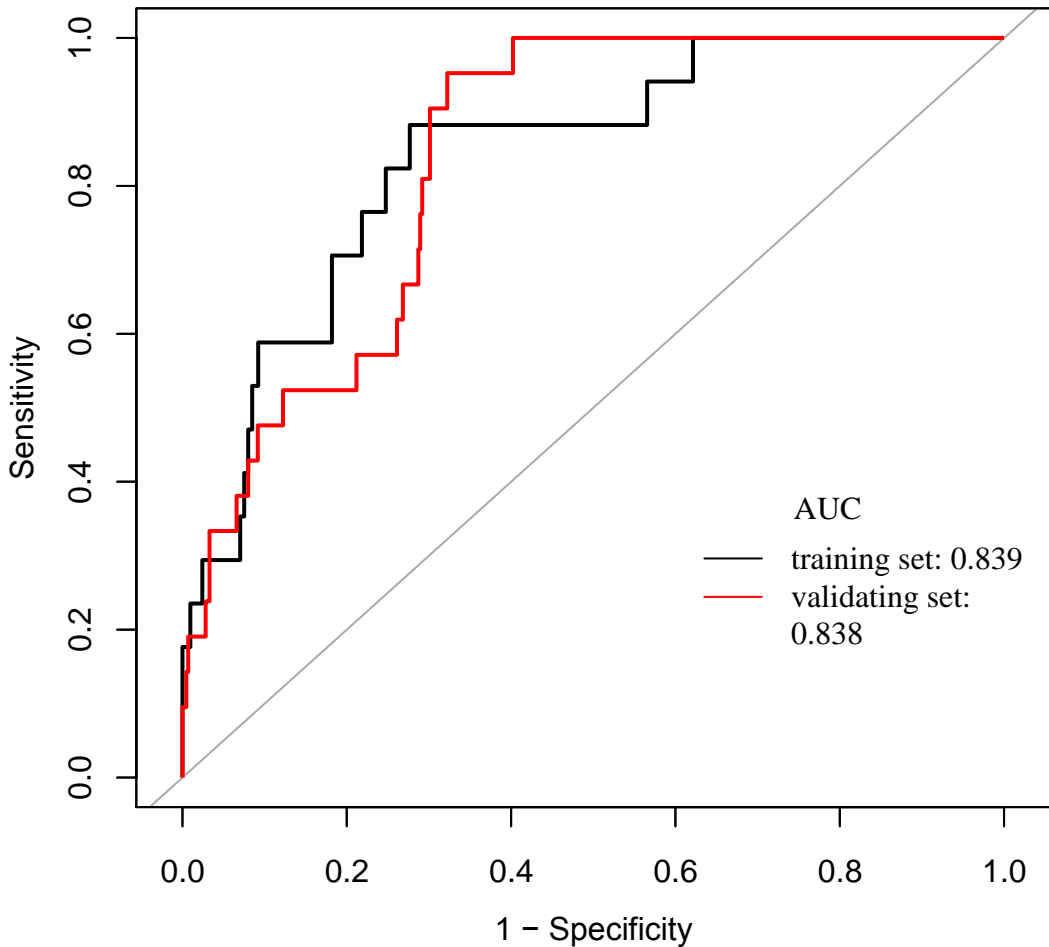

Supplement: Supplementary_Figuer_1.pdf [file Supplementary_Figuer_1.pdf]
