# Supplementary material for: Prediction model of emergency mortality risk in patients with acute upper gastrointestinal bleeding: a retrospective study
Source: PeerJ journal article supplement (doi:10.7717/peerj.11656), 2021-06-24
Supplement: supplementary_Figure_2.pdf [file supplementary_Figure_2.pdf]

**A**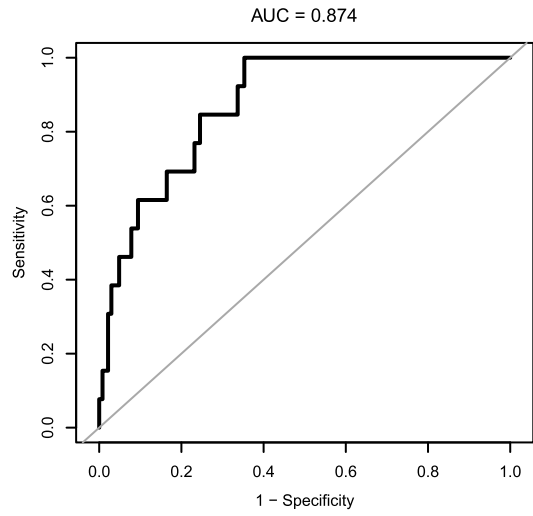**B**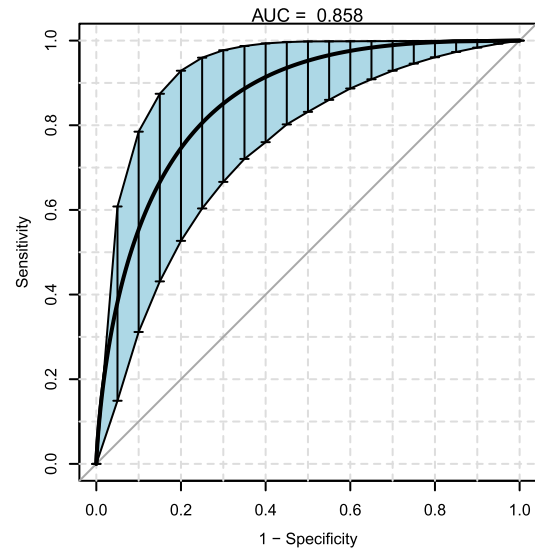**C**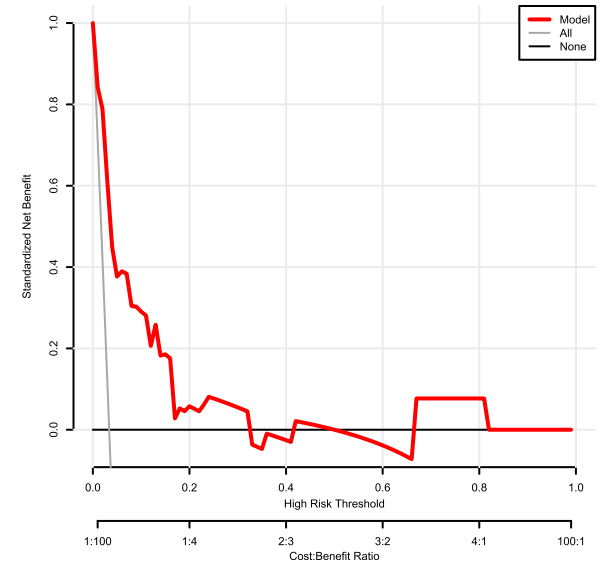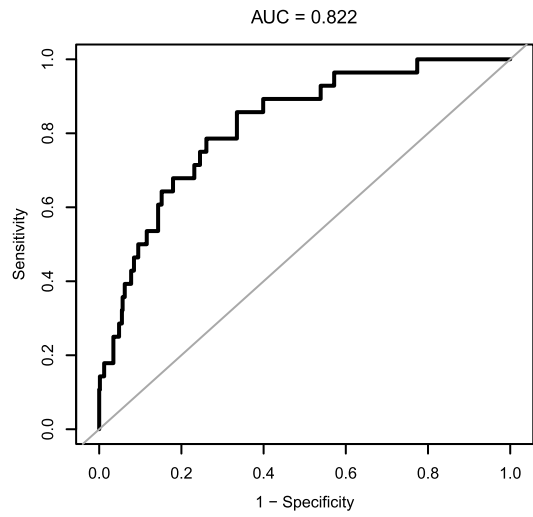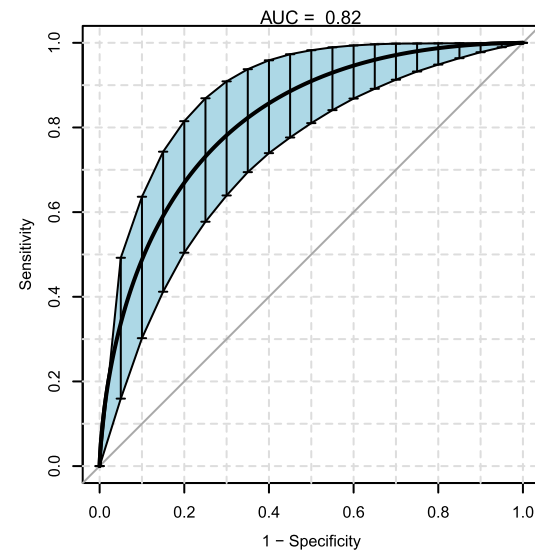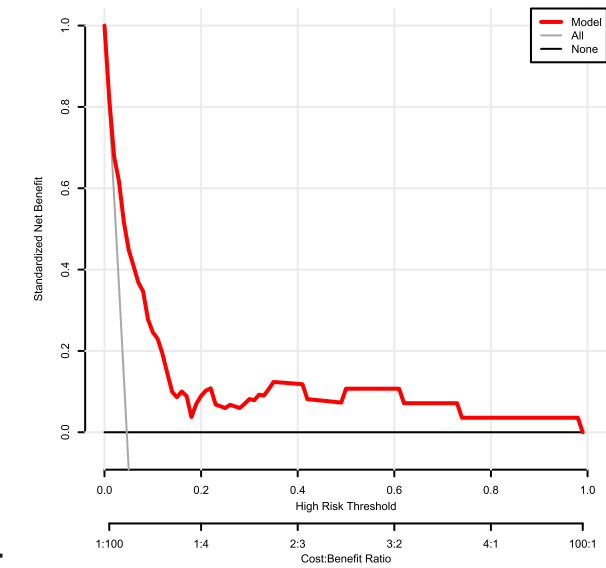**D****E****F**
